# Supplementary material for: A Structure-Based Approach for Detection of Thiol Oxidoreductases and Their Catalytic Redox-Active Cysteine Residues
Source: PubMed Central journal article supplement (PMC2673044; doi:10.1371/journal.pcbi.1000383), 2009-05-08
Supplement: pcbi.1000383.s007.pdf [file pcbi.1000383.s007.pdf]

**Table S1. Thiol oxidoreductases**

| PDB ID | Protein name (pdb header)                       | SOURCE                                 | FOLD                      | Catalytic Cys (pdb numbering) |
|--------|-------------------------------------------------|----------------------------------------|---------------------------|-------------------------------|
| 1DBY   | Chloroplast Thioredoxin                         | <i>Chlamydomonas reinhardtii</i>       | Thioredoxin               | 31                            |
| 1QUW   | Thioredoxin                                     | <i>Alicyclobacillus acidocaldarius</i> | Thioredoxin               | 29                            |
| 1TI3   | Thioredoxin                                     | <i>Populus tremula</i>                 | Thioredoxin               | 38                            |
| 1XOA   | Thioredoxin                                     | <i>Escherichia coli</i>                | Thioredoxin               | 32                            |
| 1XW9   | Thioredoxin                                     | <i>Drosophila melanogaster</i>         | Thioredoxin               | 32                            |
| 2GZY   | Thioredoxin                                     | <i>Bacillus subtilis</i>               | Thioredoxin               | 29                            |
| 3TRX   | Thioredoxin                                     | <i>Homo sapiens</i>                    | Thioredoxin               | 32                            |
| 1DE1   | Glutaredoxin                                    | <i>Bacteriophage T4</i>                | Thioredoxin               | 14                            |
| 1WJK   | Glutaredoxin                                    | <i>Mus musculus</i>                    | Thioredoxin               | 27                            |
| 1EGO   | Glutaredoxin                                    | <i>Escherichia coli</i>                | Thioredoxin               | 11                            |
| 1Z7R   | Glutaredoxin                                    | <i>Populus tremula</i>                 | Thioredoxin               | 31                            |
| 2FLS   | Glutaredoxin 2                                  | <i>Homo sapiens</i>                    | Thioredoxin               | 37                            |
| 1QQ2   | Peroxiredoxin 2                                 | <i>Rattus norvegicus</i>               | Thioredoxin               | 52                            |
| 2PN8   | Peroxiredoxin 4                                 | <i>Homo sapiens</i>                    | Thioredoxin               | 124                           |
| 1OC3   | Peroxiredoxin 5                                 | <i>Homo sapiens</i>                    | Thioredoxin               | 47                            |
| 1TP9   | Peroxiredoxin 2                                 | <i>Populus tremula</i>                 | Thioredoxin               | 51                            |
| 1XXU   | AhpE (1-cys peroxiredoxin)                      | <i>Mycobacterium tuberculosis</i>      | Thioredoxin               | 45                            |
| 2C0D   | Peroxiredoxin 2                                 | <i>Plasmodium falciparum</i>           | Thioredoxin               | 67                            |
| 1X5D   | Protein Disulfide Isomerase (PDI)               | <i>Homo sapiens</i>                    | Thioredoxin               | 37                            |
| 2DJJ   | PDI                                             | <i>Humicola insolens</i>               | Thioredoxin               | 37                            |
| 1MEK   | PDI Beta subunit                                | <i>Homo sapiens</i>                    | Thioredoxin               | 36                            |
| 1A2J   | DsbA-II                                         | <i>Escherichia coli</i>                | Thioredoxin               | 30                            |
| 1V57   | DsbG                                            | <i>Escherichia coli</i>                | Thioredoxin               | 109                           |
| 1JZD   | DsbC-DsbDalpha complex                          | <i>Escherichia coli</i>                | Thioredoxin               | 98                            |
| 1BED   | DsbA                                            | <i>Vibrio cholera</i>                  | Thioredoxin               | 30                            |
| 2OBK   | SelW                                            | <i>Pseudomonas fluorescens</i>         | Thioredoxin               | 16                            |
| 1PSQ   | Thiol peroxidase (atypical 2 cys peroxiredoxin) | <i>Streptococcus pneumoniae</i>        | Thioredoxin               | 58                            |
| 2Y25   | Thiol peroxidase                                | <i>Mycobacterium tuberculosis</i>      | Thioredoxin               | 60*                           |
| 2Z9S   | Peroxiredoxin 1                                 | <i>Rattus norvegicus</i>               | Thioredoxin               | 52*                           |
| 1Q98   | Thiol peroxidase                                | <i>Haemophilus influenzae</i>          | Thioredoxin               | 59                            |
| 1QXH   | Thiol peroxidase                                | <i>Escherichia coli</i>                | Thioredoxin               | 61                            |
| 1I9D   | Arsenate Reductase (ArsC)                       | <i>Escherichia coli</i>                | Thioredoxin               | 12                            |
| 2P5R   | glutathione peroxidase 5                        | <i>Populus tremula</i>                 | Thioredoxin               | 44                            |
| 2P31   | glutathione peroxidase 7                        | <i>Homo sapiens</i>                    | Thioredoxin               | 57                            |
| 2FWE   | C-terminal domain DsbD gamma                    | <i>Escherichia coli</i>                | Thioredoxin               | 461                           |
| 2GS3   | glutathione peroxidase 4                        | <i>Homo sapiens</i>                    | Thioredoxin               | 73                            |
| 2HE3   | glutathione peroxidase 2                        | <i>Homo sapiens</i>                    | Thioredoxin               | 40                            |
| 2I3Y   | glutathione peroxidase 5                        | <i>Homo sapiens</i>                    | Thioredoxin               | 73                            |
| 1GER   | Glutathione reductase                           | <i>Escherichia coli</i>                | FAD/NAD(P)-binding domain | 42                            |
| 1GRT   | Glutathione reductase                           | <i>Homo sapiens</i>                    | FAD/NAD(P)-binding domain | 58                            |
| 1ONF   | Glutathione reductase                           | <i>Plasmodium falciparum</i>           | FAD/NAD(P)-binding domain | 39                            |
| 1AOG   | Trypanothione reductase                         | <i>Trypanosoma cruzi</i>               | FAD/NAD(P)-binding domain | 53                            |

|             |                                                |                                   |                                             |     |
|-------------|------------------------------------------------|-----------------------------------|---------------------------------------------|-----|
| <b>1H6V</b> | Thioredoxin reductase                          | <i>Rattus norvegicus</i>          | FAD/NAD(P)-binding domain                   | 59  |
| <b>2NVK</b> | Thioredoxin reductase                          | <i>Drosophila melanogaster</i>    | FAD/NAD(P)-binding domain                   | 62  |
| <b>1VDC</b> | Thioredoxin reductase                          | <i>Arabidopsis thaliana</i>       | FAD/NAD(P)-binding domain                   | 138 |
| <b>2Q0K</b> | Thioredoxin reductase                          | <i>Helicobacter pylori</i>        | FAD/NAD(P)-binding domain                   | 136 |
| <b>2A87</b> | Thioredoxin reductase                          | <i>Mycobacterium tuberculosis</i> | FAD/NAD(P)-binding domain                   | 148 |
| <b>1TRB</b> | Thioredoxin reductase                          | <i>Escherichia coli</i>           | FAD/NAD(P)-binding domain                   | 105 |
| <b>1JR8</b> | Erv2p                                          | <i>Saccharomyces cerevisiae</i>   | ERO1-like                                   | 83  |
| <b>2HJ3</b> | Erv1p                                          | <i>Arabidopsis thaliana</i>       | Four-helical up-and-down bundle             | 83  |
| <b>1RP4</b> | Ero1p                                          | <i>Saccharomyces cerevisiae</i>   | Four-helical up-and-down bundle             | 352 |
| <b>1XM0</b> | Methionine sulfoxide reductase B (MsrB)        | <i>Bacillus subtilis</i>          | Mss4-like                                   | 115 |
| <b>1L1D</b> | Pil MsrB                                       | <i>Neisseria gonorrhoeae</i>      | Mss4-like                                   | 495 |
| <b>1NWA</b> | MsrA                                           | <i>Mycobacterium tuberculosis</i> | Ferredoxin-like                             | 13  |
| <b>2GT3</b> | MsrA                                           | <i>Escherichia coli</i>           | Ferredoxin-like                             | 51  |
| <b>1FVA</b> | MsrA                                           | <i>Bos taurus</i>                 | Ferredoxin-like                             | 72  |
| <b>2J89</b> | MsrA                                           | <i>Populus tremula</i>            | Ferredoxin-like                             | 46  |
| <b>1VHM</b> | Free Methionine sulfoxide reductase GAF domain | <i>Escherichia coli</i>           | Profilin-like                               | 118 |
| <b>1F5M</b> | Free Methionine sulfoxide reductase GAF domain | <i>Saccharomyces cerevisiae</i>   | Profilin-like                               | 125 |
| <b>1LJL</b> | Arsenate reductase                             | <i>Staphylococcus aureus</i>      | Phosphotyrosine protein phosphatases I-like | 10  |
| <b>1Y1L</b> | Arsenate reductase                             | <i>Archaeoglobus fulgidus</i>     | Phosphotyrosine protein phosphatases I-like | 6   |
| <b>1JL3</b> | Arsenate reductase                             | <i>Bacillus subtilis</i>          | Phosphotyrosine protein phosphatases I-like | 10  |
| <b>1QWI</b> | OsmC                                           | <i>Escherichia coli</i>           | OsmC-like                                   | 59  |
| <b>1ZB9</b> | Organic peroxide resistance protein (OhR)      | <i>Xylella fastidiosa</i>         | OsmC-like                                   | 61  |
| <b>2OPL</b> | OsmC                                           | <i>Geobacter sulfurreducens</i>   | OsmC-like                                   | 56  |
| <b>2D7V</b> | OsmC-like Protein VCA03                        | <i>Vibrio cholerae</i>            | OsmC-like                                   | 76  |
| <b>1USP</b> | OhR                                            | <i>Deinococcus radiodurans</i>    | OsmC-like                                   | 57  |
| <b>1N2F</b> | OhR                                            | <i>Pseudomonas aeruginosa</i>     | OsmC-like                                   | 60  |
| <b>2PRR</b> | alkyl hydroperoxidase (AhpD)                   | <i>Ralstonia eutropha</i>         | AhpD-like                                   | 89  |
| <b>2OUW</b> | AhpD                                           | <i>Rhodospirillum rubrum</i>      | AhpD-like                                   | 86  |
| <b>2CWQ</b> | conserved protein TTHA0727 (AhpD-like)         | <i>Thermus thermophilus</i>       | AhpD-like                                   | 73  |
| <b>2GMY</b> | AhpD                                           | <i>Agrobacterium tumefaciens</i>  | AhpD-like                                   | 51  |
| <b>1KNC</b> | AhpD                                           | <i>Mycobacterium tuberculosis</i> | AhpD-like                                   | 133 |
| <b>1JPE</b> | DsbD-alpha ( N-terminal domain of DsbD)        | <i>Escherichia coli</i>           | Immunoglobulin-like beta-sandwich           | 109 |

\* These proteins have the catalytic Cys mutated to serine in the structure. They have been *in silico* mutated to restore the catalytic Cys, with standard modeling techniques (see Methods in the main text)
