# Supplementary material for: A Structure-Based Approach for Detection of Thiol Oxidoreductases and Their Catalytic Redox-Active Cysteine Residues
Source: PubMed Central journal article supplement (PMC2673044; doi:10.1371/journal.pcbi.1000383), 2009-05-08
Supplement: pcbi.1000383.s008.pdf [file pcbi.1000383.s008.pdf]

**Table S2. Enzymes with catalytic non-redox Cys**

| <b>PDB ID</b> | <b>Protein name (pdb header)</b>                | <b>SOURCE</b>                           | <b>FOLD</b>                                        | <b>Catalytic Cys (pdb numbering)</b> |
|---------------|-------------------------------------------------|-----------------------------------------|----------------------------------------------------|--------------------------------------|
| 1PE6          | <i>Papain</i>                                   | <i>Carica papaya</i>                    | <i>Cysteine proteinases</i>                        | 25                                   |
| 1DF0          | <i>M-calpain</i>                                | <i>Rattus norvegicus</i>                | <i>Cysteine proteinases</i>                        | 105                                  |
| 1DKI          | <i>Zymogen form of Exotoxin B</i>               | <i>Streptococcal pyrogenic exotoxin</i> | <i>Cysteine proteinases</i>                        | 47                                   |
| 1CMX          | <i>Ubiquitin YUH1-UBAL</i>                      | <i>Homo sapiens</i>                     | <i>Cysteine proteinases</i>                        | 90                                   |
| 1QMY          | <i>FMD Virus leader protease</i>                | <i>Foot-and-mouth disease virus</i>     | <i>Cysteine proteinases</i>                        | 51                                   |
| 1CV8          | <i>Staphopain</i>                               | <i>Staphylococcus aureus</i>            | <i>Cysteine proteinases</i>                        | 24                                   |
| 1ICE          | <i>Caspase-1</i>                                | <i>Rattus norvegicus</i>                | <i>Caspase-like</i>                                | 285                                  |
| 1CVR          | <i>Gingipain R</i>                              | <i>Porphyromonas gingivalis</i>         | <i>Caspase-like</i>                                | 244                                  |
| 1AVP          | <i>Adenovirus 2 proteinase</i>                  | <i>Adenovirus type 2</i>                | <i>Cysteine proteinases</i>                        | 122                                  |
| 1EUV          | <i>ULP1 endopeptide</i>                         | <i>Saccharomyces cerevisiae</i>         | <i>Cysteine proteinases</i>                        | 580                                  |
| 1AUG_         | <i>Pyroglutamyl peptidase I</i>                 | <i>Bacillus amyloliquefaciens</i>       | <i>Phosphorylase/hydrolase-like</i>                | 144                                  |
| 1AT0          | <i>hedgehog autoprocessing domain (Hhc)</i>     | <i>Drosophila melanogaster</i>          | <i>Hedgehog/intein (Hint) domain</i>               | 122                                  |
| 1HAV          | <i>Picornain 3C</i>                             | <i>Hepatitis A virus</i>                | <i>Trypsin-like serine proteases</i>               | 172                                  |
| 1GFY          | <i>Protein Tyrosine phosphatase (PTP) 1B</i>    | <i>Homo sapiens</i>                     | <i>(Phosphotyrosine protein) phosphatases II</i>   | 258                                  |
| 1D5R          | <i>PTEN</i>                                     | <i>Homo sapiens</i>                     | <i>(Phosphotyrosine protein) phosphatases II</i>   | 124                                  |
| 2FEK          | <i>PTP</i>                                      | <i>Escherichia coli</i>                 | <i>Phosphotyrosine protein phosphatases I-like</i> | 9                                    |
| 1YPV          | <i>Thymidylate synthase</i>                     | <i>Homo sapiens</i>                     | <i>Thymidylate synthase/dCMP hydroxymethylase</i>  | 195                                  |
| 1TJS          | <i>Thymidylate synthase</i>                     | <i>Escherichia coli</i>                 | <i>Thymidylate synthase/dCMP hydroxymethylase</i>  | 146                                  |
| 1YTS          | <i>PTP</i>                                      | <i>Yersinia enterocolitica</i>          | <i>Phosphotyrosine protein phosphatases I-like</i> | 403                                  |
| 2I6P          | <i>PTP</i>                                      | <i>archaeal sulfolobus</i>              | <i>(Phosphotyrosine protein) phosphatases II</i>   | 96                                   |
| 1JLN          | <i>PTP</i>                                      | <i>Mus musculus</i>                     | <i>(Phosphotyrosine protein) phosphatases II</i>   | 480                                  |
| 1D1P          | <i>Low molecular weight PTP</i>                 | <i>Saccharomyces cerevisiae</i>         | <i>Phosphotyrosine protein phosphatases I-like</i> | 13                                   |
| 2NQA          | <i>Calpain</i>                                  | <i>Homo sapiens</i>                     | <i>Cysteine proteinases</i>                        | 105                                  |
| 1QXP          | <i>mu-like calpain</i>                          | <i>Rattus norvegicus</i>                | <i>Cysteine proteinases</i>                        | 105                                  |
| 3BCN          | <i>Papain-like Ervatamin-A</i>                  | <i>Ervatamia coronaria</i>              | <i>Cysteine proteinases</i>                        | 25                                   |
| 2E00          | <i>bleomycin hydrolase</i>                      | <i>Saccharomyces cerevisiae</i>         | <i>Cysteine proteinases</i>                        | 73                                   |
| 1M72          | <i>Caspase-1</i>                                | <i>Spodoptera frugiperda</i>            | <i>Caspase-like</i>                                | 178                                  |
| 2HBY          | <i>Caspase-1</i>                                | <i>Homo sapiens</i>                     | <i>Caspase-like</i>                                | 285                                  |
| 2FO5          | <i>Barley cysteine endoprotease B isoform 2</i> | <i>Hordeum vulgare</i>                  | <i>Cysteine proteinases</i>                        | 28                                   |
| 1GCB          | <i>Dna binding protease</i>                     | <i>Saccharomyces cerevisiae</i>         | <i>Cysteine proteinases</i>                        | 73                                   |
| 2Z3E          | <i>CoV 3C-Like peptidase</i>                    | <i>SARS Coronavirus</i>                 | <i>Trypsin-like serine proteases</i>               | 145                                  |
| 2OIV          | <i>XopD, Ubiquitin-like Protein Protease</i>    | <i>Xanthomonas campestris</i>           | <i>Cysteine proteinases</i>                        | 470                                  |
| 2BDZ          | <i>Mexicain</i>                                 | <i>Jacaratia mexicana</i>               | <i>Cysteine proteinases</i>                        | 25                                   |
| 2A5I          | <i>Human_SARS coronavirus main peptidase</i>    | <i>SARS Coronavirus</i>                 | <i>Trypsin-like serine proteases</i>               | 145                                  |
| 1JQP          | <i>Cathepsin C</i>                              | <i>Rattus norvegicus</i>                | <i>Cysteine proteinases</i>                        | 233                                  |

|             |                                                |                     |                                                          |     |
|-------------|------------------------------------------------|---------------------|----------------------------------------------------------|-----|
| <b>2DJG</b> | <i>Dipeptidyl peptidase I</i>                  | <i>Homo sapiens</i> | <i>Cysteine proteinases</i>                              | 234 |
| <b>1YOV</b> | <i>Ubiquitin-activating enzyme (E1 enzyme)</i> | <i>Homo sapiens</i> | <i>Activating enzymes of the ubiquitin-like proteins</i> | 216 |
