# Supplementary material for: A Structure-Based Approach for Detection of Thiol Oxidoreductases and Their Catalytic Redox-Active Cysteine Residues
Source: PubMed Central journal article supplement (PMC2673044; doi:10.1371/journal.pcbi.1000383), 2009-05-08
Supplement: pcbi.1000383.s009.pdf [file pcbi.1000383.s009.pdf]

Table S3. Test Case

| Source                            | PDB hit | gi           | template (%id homology modeling template) | FOLD                                                     | Cys position | Active Site Similarity score | Cys Reactivity score | Combined score |
|-----------------------------------|---------|--------------|-------------------------------------------|----------------------------------------------------------|--------------|------------------------------|----------------------|----------------|
| <i>Pyrococcus horikoshii</i>      | 1J08    |              |                                           | thioredoxin                                              | 149          | 1.5                          | 1.75                 | 3.25           |
| <i>Mycoplasma pneumoniae</i>      | 1LQL    |              |                                           | OsmC-like                                                | 252          | 1.5                          | 1.25                 | 2.75           |
| <i>Escherichia coli</i>           | 1SK0    |              |                                           | thioredoxin                                              | 12           | 2.5                          | 1                    | 3.5            |
| <i>Bos taurus Mitochondrial</i>   | 1ZYE    |              |                                           | thioredoxin                                              | 47           | 3.5                          | 0.5                  | 4              |
| <i>Neisseria meningitidis</i>     | 2FY6    |              |                                           | thioredoxin                                              | 67           | 2.5                          | 1                    | 3.5            |
| <i>Neisseria gonorrhoeae</i>      | 2H30    |              |                                           | thioredoxin                                              | 68           | 2.5                          | 1                    | 3.5            |
| <i>Ectromelia virus</i>           | 2HZF    |              |                                           | thioredoxin                                              | 23           | 2                            | 1.25                 | 3.25           |
| <i>Saccharomyces cerevisiae</i>   | 2JAC    |              |                                           | thioredoxin                                              | 30           | 1.5                          | 1.5                  | 3              |
| <i>Pseudomonas aeruginosa</i>     | 2O4D    |              |                                           | AhpD-like                                                | 51           | 3.5                          | 2                    | 5.5            |
| <i>Silicibacter sp. TM1040</i>    | 2PFX    |              |                                           | thioredoxin                                              | 88           | 3.5                          | 2                    | 5.5            |
| <i>Aquifex aeolicus</i>           | 2YWM    |              |                                           | thioredoxin                                              | 151          | 1.625                        | 1.25                 | 2.875          |
| <i>Clostridium kluyveri</i>       |         | gi 153955052 | 1XM0(62%)                                 | Mss4-like                                                | 119          | 2.25                         | 2                    | 4.25           |
| <i>Rattus norvegicus</i>          |         | gi 16758004  | 1FVA (85%)                                | Ferredoxin-like                                          | 72           | 3.5                          | 2                    | 5.5            |
| <i>Xenopus laevis</i>             |         | gi 148235445 | 1FVA (70%)                                | Ferredoxin-like                                          | 51           | 3.5                          | 2                    | 5.5            |
| <i>Bos taurus</i>                 | 1GP1    |              |                                           | thioredoxin                                              | 45           | 2.75                         | 0.5                  | 3.25           |
| <i>Bacillus cereus</i>            |         | gi 52143310  | 2P5Q(48%)                                 | thioredoxin                                              | 35           | 2.25                         | 1.75                 | 4              |
| <i>Drosophila melanogaster</i>    |         | gi 24656772  | 2P5R(51%)                                 | thioredoxin                                              | 49           | 2.25                         | 0.75                 | 3              |
| <i>Escherichia coli</i>           | 1TRB    |              |                                           | FAD/NAD-linked reductases                                | 135          | 1.25                         | 2                    | 3.25           |
| <i>Mus musculus</i>               | 1ZKQ    |              |                                           | FAD/NAD-linked reductases                                | 86           | 1.25                         | 2                    | 3.25           |
| <i>Crithidia fasciculata</i>      | 2TPR    |              |                                           | FAD/NAD-linked reductases                                | 51           | 1                            | 2                    | 3              |
| <i>Oryza Sativa</i>               |         | gi 4106694   | 1FEC(44%)                                 | FAD/NAD-linked reductases                                | 70           | 1                            | 2                    | 3              |
| <i>Saccharomyces cerevisiae</i>   | 1A6R    |              |                                           | Papain-like                                              | 73           | 0                            | 0.5                  | 0.5            |
| <i>Homo sapiens</i>               | 1CB5    |              |                                           | Papain-like                                              | 73           | 0                            | 0                    | 0              |
| <i>Homo sapiens</i>               | 1NL6    |              |                                           | Cysteine proteinases                                     | 25           | 0.5                          | 1.25                 | 1.75           |
| <i>Homo sapiens</i>               | 1XD3    |              |                                           | Cysteine proteinases                                     | 95           | 0.5                          | 1.75                 | 2.25           |
| <i>Cryptococcus neoformans</i>    | 2AAZ    |              |                                           | Thymidylate synthase                                     | 187          | 0                            | 1.25                 | 1.25           |
| <i>Selenomonas ruminantium</i>    | 2B4U    |              |                                           | (Phosphotyrosine protein)                                | 252          | 0                            | 1.25                 | 1.25           |
| <i>Bos taurus</i>                 | 2DCC    |              |                                           | Cysteine proteinases                                     | 29           | 0                            | 0.75                 | 0.75           |
| <i>Homo sapiens</i>               | 2ETL    |              |                                           | Cysteine proteinases                                     | 90           | 0                            | 1.75                 | 1.75           |
| <i>Campylobacter jejuni</i>       | 2GI4    |              |                                           | (Phosphotyrosine protein)                                | 8            | 0                            | 1                    | 1              |
| <i>Fasciola hepatica</i>          | 2O6X    |              |                                           | Cysteine proteinases                                     | 116          | 0                            | 1                    | 1              |
| <i>Cryptosporidium hominis</i>    | 2OIP    |              |                                           | Thymidylate synthase                                     | 402          | 0.5                          | 1.5                  | 2              |
| <i>Mycobacterium tuberculosis</i> | 2OZ5    |              |                                           | (Phosphotyrosine protein)                                | 160          | 0                            | 2                    | 2              |
| <i>Lactobacillus casei</i>        | 2TDM    |              |                                           | Thymidylate synthase                                     | 198          | 0.5                          | 1.5                  | 2              |
| <i>Homo sapiens</i>               | 2D2Z    |              |                                           | Glutathione S-transferase (GST), C-terminal Domain       | 234          | 1.25                         | 1                    | 2.25           |
| <i>Rattus norvegicus</i>          | 1FLJ    |              |                                           | Carbonic anhydrase                                       | 188          | 0                            | 0                    | 0              |
| <i>Homo sapiens</i>               | 1HNL    |              |                                           | Lysozyme-like                                            | 95           | 1.25                         | 1                    | 2.25           |
| <i>Oryctolagus cuniculus</i>      | 1IJJ    |              |                                           | Ribonuclease H-like motif                                | 374          | 0.5                          | 0.75                 | 1.25           |
| <i>Homo sapiens</i>               | 1KCG    |              |                                           | C-type lectin-like                                       | 109          | 0.5                          | 0.75                 | 1.25           |
| <i>Homo sapiens</i>               | 1EEM    |              |                                           | Glutathione S-transferase (GST), thioredoxin-like domain | 32           | 1.5                          | 1                    | 2.5            |
| <i>Homo sapiens</i>               | 2O02    |              |                                           | alpha-alpha superhelix                                   | 25           | 0.5                          | 0.5                  | 1              |
| <i>Homo sapiens</i>               | 1W7B    |              |                                           | Annexin                                                  | 294          | 1.25                         | 1                    | 2.25           |
| <i>Homo sapiens</i>               |         | gi 1703322   | 1ANN(59%)                                 | Annexin                                                  | 133          | 0.5                          | 1                    | 1.5            |

|                     |      |                    |            |                                                      |     |      |      |      |
|---------------------|------|--------------------|------------|------------------------------------------------------|-----|------|------|------|
| <i>Ovis aries</i>   | 1UW3 |                    |            | Prion-like                                           | 148 | 1.5  | 0    | 1.5  |
| <i>Homo sapiens</i> |      | <i>gi 23512328</i> | 2OVR (34%) | Ferredoxin-like                                      | 245 | 0    | 0.5  | 0.5  |
| <i>Homo sapiens</i> |      | <i>gi 119172</i>   | 1NOU(64%)  | Reductase/isomerase/                                 | 567 | 0.5  | 0    | 0.5  |
| <i>Homo sapiens</i> |      | <i>gi 55584035</i> | 1F60(81%)  | Reductase/isomerase/elongation factor common domain  | 234 | 0.25 | 1.5  | 1.75 |
| <i>Homo sapiens</i> |      | <i>gi 21264428</i> | 1YUW(55%)  | Ribonuclease H-like motif                            | 487 | 0    | 0    | 0    |
| <i>Homo sapiens</i> |      | <i>gi 6166599</i>  | 2AKA(48%)  | P-loop containing nucleoside triphosphate hydrolases | 91  | 0.25 | 0.25 | 0.5  |
| <i>Homo sapiens</i> | 1CYN |                    |            | Cyclophilin-like                                     | 202 | 0.25 | 0.75 | 1    |
| <i>Homo sapiens</i> | 2GF9 |                    |            | P-loop containing nucleoside triphosphate hydrolases | 184 | 0.5  | 0.75 | 1.25 |
| <i>Homo sapiens</i> |      | <i>gi 730922</i>   | 1Q3R(38%)  | GroEL-intermediate domain like /Cystatin like domain | 406 | 0.75 | 0    | 0.75 |
| <i>Homo sapiens</i> |      | <i>gi 74762725</i> | 1XTD(46%)  | SH3-like barrel                                      | 73  | 0    | 1    | 1    |
| <i>Homo sapiens</i> | 1TR2 |                    |            | Four-helical up-and-down                             | 85  | 0.25 | 0    | 0.25 |
