# Supplementary material for: A Structure-Based Approach for Detection of Thiol Oxidoreductases and Their Catalytic Redox-Active Cysteine Residues
Source: PubMed Central journal article supplement (PMC2673044; doi:10.1371/journal.pcbi.1000383), 2009-05-08
Supplement: pcbi.1000383.s011.pdf [file pcbi.1000383.s011.pdf]

**Table S5. Detailed results for the yeast proteome**

| <b>ID</b>    | <b>Best scoring Cys, position</b> | <b>Active Site Similarity score</b> | <b>Cys Reactivity score</b> | <b>Combined Score</b> |
|--------------|-----------------------------------|-------------------------------------|-----------------------------|-----------------------|
| >gi 6319726  | 75                                | 0.5                                 | 1.75                        | <b>2.25</b>           |
| >gi 6319966  | 81                                | 0                                   | 0                           | <b>0</b>              |
| >gi 6320720  | 60                                | 3                                   | 1.75                        | <b>4.75</b>           |
| >gi 6320796  | 26                                | 0                                   | 1.5                         | <b>1.5</b>            |
| >gi 6321022  | 36                                | 2.5                                 | 1.25                        | <b>3.75</b>           |
| >gi 14318471 | 212                               | 0.5                                 | 2                           | <b>2.5</b>            |
| >gi 14318558 | 122                               | 1.25                                | 2                           | <b>3.25</b>           |
| >gi 6321631  | 149                               | 1.25                                | 2                           | <b>3.25</b>           |
| >gi 6321706  | 202                               | 0                                   | 1.5                         | <b>1.5</b>            |
| >gi 6322180  | 106                               | 3                                   | 0                           | <b>3</b>              |
| >gi 6322468  | 149                               | 0.5                                 | 1.5                         | <b>2</b>              |
| >gi 6322559  | 89                                | 0                                   | 1.25                        | <b>1.25</b>           |
| >gi 6323613  | 47                                | 2.75                                | 1                           | <b>3.75</b>           |
| >gi 6324090  | 101                               | 0.5                                 | 0                           | <b>0.5</b>            |
| >gi 6324639  | 103                               | 0                                   | 1.5                         | <b>1.5</b>            |
| >gi 6325168  | 38                                | 0                                   | 0                           | <b>0</b>              |
| >gi 6325296  | 120                               | 1.5                                 | 2                           | <b>3.5</b>            |
| >gi 6325330  | 13                                | 2                                   | 1.5                         | <b>3.5</b>            |
| >gi 6319925  | 57                                | 3                                   | 1.5                         | <b>4.5</b>            |
| >gi 6320304  | 193                               | 0.5                                 | 0.25                        | <b>0.75</b>           |
| >gi 6681846  | 129                               | 1.5                                 | 2                           | <b>3.5</b>            |
| >gi 6321648  | 33                                | 3.5                                 | 2                           | <b>5.5</b>            |
| >gi 6323072  | 32                                | 3.5                                 | 1.5                         | <b>5</b>              |
| >gi 6324082  | 62                                | 0.5                                 | 0.5                         | <b>1</b>              |
| >gi 6324296  | 213                               | 0                                   | 2                           | <b>2</b>              |
| >gi 6324360  | 17                                | 0.5                                 | 0                           | <b>0.5</b>            |
| >gi 6325255  | 102                               | 0                                   | 0                           | <b>0</b>              |
| >gi 6325339  | 38                                | 0.25                                | 0.25                        | <b>0.5</b>            |
| >gi 6319498  | 157                               | 1                                   | 1.5                         | <b>2.5</b>            |
| >gi 6320303  | 71                                | 2.5                                 | 1                           | <b>3.5</b>            |
| >gi 6320695  | 55                                | 1                                   | 1.5                         | <b>2.5</b>            |
| >gi 6320917  | 321                               | 0                                   | 2                           | <b>2</b>              |
| >gi 6320972  | 776                               | 0                                   | 0                           | <b>0</b>              |
| >gi 6321025  | 193                               | 0.75                                | 0.25                        | <b>1</b>              |
| >gi 14318479 | 284                               | 0                                   | 1.25                        | <b>1.25</b>           |
| >gi 14318481 | 126                               | 0                                   | 0.25                        | <b>0.25</b>           |
| >gi 6321691  | 251                               | 0.25                                | 2                           | <b>2.25</b>           |
| >gi 6321832  | 643                               | 0.75                                | 0                           | <b>0.75</b>           |
| >gi 6681848  | 178                               | 0.75                                | 1.25                        | <b>2</b>              |
| >gi 6322155  | 62                                | 1                                   | 2                           | <b>3</b>              |
| >gi 6322811  | 195                               | 0.25                                | 0.5                         | <b>0.75</b>           |

|              |     |      |      |      |
|--------------|-----|------|------|------|
| >gi 6322921  | 79  | 1    | 2    | 3    |
| >gi 6323224  | 171 | 1    | 1    | 2    |
| >gi 6323383  | 168 | 1    | 1.5  | 2.5  |
| >gi 6323609  | 179 | 0    | 0    | 0    |
| >gi 6323703  | 483 | 0.25 | 0.5  | 0.75 |
| >gi 6324191  | 405 | 0.75 | 1.25 | 2    |
| >gi 6324275  | 318 | 0.5  | 2    | 2.5  |
| >gi 6324374  | 111 | 1    | 1    | 2    |
| >gi 6324648  | 131 | 0.75 | 1    | 1.75 |
| >gi 6324818  | 217 | 0.25 | 1.5  | 1.75 |
| >gi 6324899  | 257 | 0.75 | 1.5  | 2.25 |
| >gi 6324950  | 323 | 0.25 | 2    | 2.25 |
| >gi 6325237  | 579 | 0    | 0.75 | 0.75 |
| >gi 6319488  | 107 | 2.5  | 0    | 2.5  |
| >gi 6320193  | 135 | 3.5  | 0    | 3.5  |
| >gi 6320661  | 47  | 3.5  | 0.25 | 3.75 |
| >gi 6320742  | 137 | 0    | 1.5  | 1.5  |
| >gi 14318475 | 274 | 0    | 1.5  | 1.5  |
| >gi 14318532 | 117 | 0    | 0    | 0    |
| >gi 6323396  | 24  | 2    | 2    | 4    |
| >gi 6323761  | 122 | 0    | 2    | 2    |
| >gi 6323984  | 137 | 0    | 0    | 0    |
| >gi 6324975  | 138 | 0    | 0    | 0    |
| >gi 6319407  | 90  | 2.5  | 0.25 | 2.75 |
| >gi 6320492  | 33  | 3.25 | 1    | 4.25 |
| >gi 6320714  | 530 | 0    | 1    | 1    |
| >gi 6321388  | 53  | 1.75 | 1    | 2.75 |
| >gi 6322078  | 139 | 0    | 2    | 2    |
| >gi 6322467  | 283 | 1    | 0.5  | 1.5  |
| >gi 6322557  | 154 | 1    | 1    | 2    |
| >gi 6322764  | 83  | 0    | 0.75 | 0.75 |
| >gi 6323109  | 229 | 0    | 0    | 0    |
| >gi 6323757  | 272 | 0    | 2    | 2    |
| >gi 6323962  | 324 | 0.5  | 0    | 0.5  |
| >gi 6324230  | 167 | 0    | 1    | 1    |
| >gi 6324356  | 135 | 0.25 | 2    | 2.25 |
| >gi 6324401  | 196 | 0    | 1.25 | 1.25 |
| >gi 6324825  | 258 | 0    | 0.75 | 0.75 |
| >gi 6325169  | 22  | 0.5  | 0    | 0.5  |
| >gi 6319733  | 53  | 0    | 0    | 0    |
| >gi 6319971  | 251 | 0.5  | 2    | 2.5  |
| >gi 6320389  | 114 | 0.25 | 0    | 0.25 |
| >gi 6320610  | 434 | 0    | 0    | 0    |
| >gi 6320726  | 61  | 3.5  | 0.25 | 3.75 |
| >gi 6320881  | 24  | 3.5  | 2    | 5.5  |
| >gi 6320917  | 321 | 0.25 | 2    | 2.25 |

|              |     |      |      |      |
|--------------|-----|------|------|------|
| >gi 14318459 | 90  | 0    | 0    | 0    |
| >gi 14318551 | 282 | 0    | 0    | 0    |
| >gi 6321643  | 874 | 1    | 1    | 2    |
| >gi 6322027  | 168 | 1.75 | 0    | 1.75 |
| >gi 6323138  | 61  | 2.5  | 0.25 | 2.75 |
| >gi 6323742  | 99  | 0    | 0    | 0    |
| >gi 6323821  | 301 | 0.5  | 2    | 2.5  |
| >gi 6323873  | 88  | 0    | 0.5  | 0.5  |
| >gi 6323995  | 90  | 0    | 0.75 | 0.75 |
| >gi 6324268  | 477 | 1    | 2    | 3    |
| >gi 6325196  | 305 | 0.25 | 2    | 2.25 |
| >gi 6226540  | 220 | 0    | 1.5  | 1.5  |
| >gi 6319806  | 406 | 3.5  | 0.75 | 4.25 |
| >gi 6319816  | 157 | 2    | 2    | 4    |
| >gi 6320560  | 142 | 2    | 1.5  | 3.5  |
| >gi 6320598  | 176 | 1.5  | 0    | 1.5  |
| >gi 6320661  | 48  | 3    | 0    | 3    |
| >gi 6322186  | 60  | 3    | 1    | 4    |
| >gi 6322228  | 36  | 3    | 0    | 3    |
| >gi 14318501 | 65  | 1    | 2    | 3    |
| >gi 6321898  | 165 | 1.25 | 2    | 3.25 |
| >gi 6321903  | 225 | 0    | 1    | 1    |
| >gi 6322639  | 600 | 1.5  | 0.25 | 1.75 |
| >gi 6322826  | 36  | 2.5  | 2    | 4.5  |
| >gi 6323001  | 178 | 0    | 0    | 0    |
| >gi 6323505  | 100 | 3.25 | 2    | 5.25 |
| >gi 6324484  | 56  | 3    | 1.25 | 4.25 |
| >gi 6325166  | 61  | 1    | 2    | 3    |
| >gi 6325323  | 168 | 0.75 | 1.25 | 2    |
| >gi 6319814  | 26  | 3    | 1    | 4    |
| >gi 6320001  | 168 | 0.75 | 2    | 2.75 |
| >gi 6324862  | 61  | 3.5  | 1.25 | 4.75 |
| >gi 6319721  | 36  | 3    | 0    | 3    |
| >gi 6319522  | 57  | 0    | 0.25 | 0.25 |
| >gi 6320210  | 16  | 0    | 0    | 0    |
| >gi 6320228  | 57  | 1    | 1    | 2    |
| >gi 6320998  | 77  | 1    | 0.5  | 1.5  |
| >gi 14318550 | 34  | 0    | 0.5  | 0.5  |
| >gi 7839183  | 47  | 0    | 1.25 | 1.25 |
| >gi 6323103  | 53  | 0    | 0.5  | 0.5  |
| >gi 6681849  | 76  | 0.25 | 2    | 2.25 |
| >gi 6325198  | 59  | 0.5  | 0    | 0.5  |
| >gi 6320259  | 94  | 0    | 2    | 2    |
| >gi 6325229  | 90  | 0    | 1    | 1    |
| >gi 6319741  | 118 | 1    | 1    | 2    |

|              |     |      |      |             |
|--------------|-----|------|------|-------------|
| >gi 6320303  | 71  | 3    | 0    | <b>3</b>    |
| >gi 6320808  | 159 | 1    | 0    | <b>1</b>    |
| >gi 6320869  | 222 | 0.5  | 0.75 | <b>1.25</b> |
| >gi 6322409  | 149 | 1.5  | 2    | <b>3.5</b>  |
| >gi 14318463 | 211 | 1.5  | 0.5  | <b>2</b>    |
| >gi 14318480 | 204 | 0    | 1.75 | <b>1.75</b> |
| >gi 6323822  | 301 | 0.5  | 0.25 | <b>0.75</b> |
| >gi 6324764  | 433 | 1    | 0    | <b>1</b>    |
| >gi 6323730  | 1   | 0.25 | 1    | <b>1.25</b> |
| >gi 6324967  | 137 | 0    | 1.5  | <b>1.5</b>  |
| >gi 6323244  | 143 | 0    | 0.25 | <b>0.25</b> |
| >gi 6324070  | 17  | 0    | 2    | <b>2</b>    |
| >gi 6320936  | 736 | 0.25 | 1.5  | <b>1.75</b> |
| >gi 6321228  | 103 | 1.25 | 1    | <b>2.25</b> |
| >gi 6322908  | 175 | 0    | 0.25 | <b>0.25</b> |
| >gi 6324175  | 156 | 0    | 0.5  | <b>0.5</b>  |
