# Supplementary material for: A Structure-Based Approach for Detection of Thiol Oxidoreductases and Their Catalytic Redox-Active Cysteine Residues
Source: PubMed Central journal article supplement (PMC2673044; doi:10.1371/journal.pcbi.1000383), 2009-05-08
Supplement: pcbi.1000383.s012.pdf [file pcbi.1000383.s012.pdf]

**Table S6. Predicted yeast thiol oxidoreductases**

|     | sequence id  | template (%id homology modeling template) | Best Cys | Active Site Similarity Score | Cys Reactivity score | Combined score | Predicted by the Sec/Cys method | Protein (associated gene name)                         |
|-----|--------------|-------------------------------------------|----------|------------------------------|----------------------|----------------|---------------------------------|--------------------------------------------------------|
| 1)  | >gi 6320881  | 1fva (36%)                                | 24       | 3.5                          | 2                    | 5.5            | YES                             | MsrA (Mxr1)                                            |
| 2)  | >gi 6321648  | 2fa4 (100%)                               | 33       | 3.5                          | 2                    | 5.5            | YES                             | Thioredoxin (Trx2)                                     |
| 3)  | >gi 6323505  | 1rp4 (100%)                               | 352      | 3.25                         | 2                    | 5.25           | YES                             | Ero1-p (Ero1)                                          |
| 4)  | >gi 6323072  | 2i9h (100%)                               | 32       | 3.5                          | 1.5                  | 5              | YES                             | Thioredoxin (Trx1)                                     |
| 5)  | >gi 6320720  | 2jac (67%)                                | 60       | 3                            | 1.75                 | 4.75           | YES                             | Glutaredoxin (Grx2)                                    |
| 6)  | >gi 6324862  | 2dml (42%)                                | 61       | 3.5                          | 1.25                 | 4.75           | YES                             | PDI related protein A (Mpd1)                           |
| 7)  | >gi 6322826  | 2p5q (43%)                                | 36       | 2.5                          | 2                    | 4.5            | YES                             | Glutathione peroxidase (Gpx1)                          |
| 8)  | >gi 6319925  | 2fa4 (43%)                                | 57       | 3.5                          | 1                    | 4.5            | YES                             | Thioredoxin (Trx3)                                     |
| 9)  | >gi 6319806  | 2b5e (100%)                               | 406      | 3.5                          | 0.75                 | 4.25           | YES                             | PDI_A family (Pdi1)                                    |
| 10) | >gi 6320492  | 1wjk (43%)                                | 33       | 3.25                         | 1                    | 4.25           | YES                             | Unknown/glutaredoxin like protein (YDR286C)            |
| 11) | >gi 6319816  | 3cez (39%)                                | 157      | 2                            | 2                    | 4              | YES                             | SeiR/MsrB (YCL033C)                                    |
| 12) | >gi 6324484  | 2djj (38%)                                | 56       | 3                            | 1.25                 | 4.25           | YES                             | Protein Disulfide Isomerase (Mpd2)                     |
| 13) | >gi 6322186  | 2b5e (35%)                                | 60       | 3                            | 1                    | 4              | YES                             | Thioredoxin-like (Eps1)                                |
| 14) | >gi 6323396  | 2ht9 (30%)                                | 24       | 2                            | 2                    | 4              | YES                             | Glutaredoxin (Grx8)                                    |
| 15) | >gi 6319814  | 2jac (98%)                                | 26       | 3                            | 1                    | 4              | YES                             | Glutaredoxin (Grx1)                                    |
| 16) | >gi 6323613  | 1qmv (66%)                                | 47       | 2.75                         | 1                    | 3.75           | YES                             | 2cys peroxiredoxin (Tsa1)                              |
| 17) | >gi 6320661  | 1qmv (60%)                                | 48       | 3.5                          | 0.25                 | 3.75           | YES                             | Peroxiredoxin (Tsa2)                                   |
| 18) | >gi 6320726  | 2b5e (42%)                                | 61       | 3.5                          | 0.25                 | 3.75           | YES                             | PDI-A family (Eug1)                                    |
| 19) | >gi 6320560  | 1vdc (62%)                                | 142      | 2                            | 1.5                  | 3.5            | YES                             | Thioredoxin reductase (Trr1)                           |
| 20) | >gi 6325330  | 1dlq (99%)                                | 13       | 2                            | 1.5                  | 3.5            | <b>NO</b>                       | phosphotyrosine phosphatase (Ltp1)                     |
| 21) | >gi 6320303  | 1wik (60%)                                | 72       | 2.5                          | 1                    | 3.5            | YES                             | Glutaredoxin (Grx3)                                    |
| 22) | >gi 6321022  | 2j23 (36%)                                | 36       | 2.5                          | 1                    | 3.5            | YES                             | Monothiol Glutaredoxin (Grx4)                          |
| 23) | >gi 6681846  | 1oqc (47%)                                | 129      | 1.5                          | 2                    | 3.5            | YES                             | Erv-1 (Erv1)                                           |
| 24) | >gi 6320193  | 2e7p (38%)                                | 135      | 3.5                          | 0                    | 3.5            | YES                             | Glutaredoxin (Grx6)                                    |
| 25) | >gi 6325296  | 1jr8 (100%)                               | 120      | 1.5                          | 2                    | 3.5            | YES                             | Erv-2 (Erv2)                                           |
| 26) | >gi 6322409  | 2i5p (76%)                                | 149      | 1.5                          | 2                    | 3.5            | <b>NO</b>                       | Glyceraldehyde-3-phosphate dehydrogenase 1 (Tdh1)      |
| 27) | >gi 14318558 | 1ezv (100%)                               | 122      | 1.25                         | 2                    | 3.25           | <b>NO</b>                       | ubiquinol-cytochrome c oxidoreductase subunit 6 (Qcr6) |
| 28) | >gi 6321898  | 1tde (51%)                                | 165      | 1.25                         | 2                    | 3.25           | YES                             | mitochondrial thioredoxin reductase (Trr2)             |
| 29) | >gi 6321631  | 2i5p (78%)                                | 149      | 1.25                         | 2                    | 3.25           | <b>NO</b>                       | Glyceraldehyde-3-phosphate dehydrogenase 3 (Tdh3)      |
| 30) | >gi 6325166  | 2hqm (100%)                               | 61       | 1                            | 2                    | 3              | YES                             | Glutathione reductase (Glr1)                           |
| 31) | >gi 14318501 | 1v59 (100%)                               | 65       | 1                            | 2                    | 3              | YES                             | Dihydrolipoamide dehydrogenase (Lpd1)                  |
| 32) | >gi 6322228  | 2p5q (50%)                                | 36       | 3                            | 0                    | 3              | YES                             | Glutathione peroxidase (Hyr1)                          |
| 33) | >gi 6320661  | 1qmv (62%)                                | 47       | 3                            | 0                    | 3              | YES                             | Peroxiredoxin (TSA2)                                   |
| 34) | >gi 6322180  | 2a4v (98%)                                | 106      | 3                            | 0                    | 3              | YES                             | alkyl hydroperoxide reductase /AhpC (Dot5)             |
| 35) | >gi 6322155  | 1izn (50%)                                | 62       | 1                            | 2                    | 3              | <b>NO</b>                       | capping-addition of actin subunits (Cap2)              |

|            |              |            |     |      |      |      |           |                                                                  |
|------------|--------------|------------|-----|------|------|------|-----------|------------------------------------------------------------------|
| <b>36)</b> | >gi 6324268  | 1ixk (36%) | 477 | 1    | 2    | 3    | <b>NO</b> | nucleolar function in rapid growth (Nop2)                        |
| <b>37)</b> | >gi 6322921  | 1wc9 (58%) | 79  | 1    | 2    | 3    | <b>NO</b> | targeting and/or fusion of ER-to-Golgi transport vesicles (Bet3) |
| <b>38)</b> | >gi 6319721  | 2p5w (51%) | 37  | 3    | 0    | 3    | YES       | Glutathione peroxidase paralogue (Gpx2p)                         |
| <b>39)</b> | >gi 6319407  | 1prx (49%) | 90  | 2.5  | 0.25 | 2.75 | YES       | Mitochondrial peroxiredoxin (Prx1)                               |
| <b>40)</b> | >gi 6323138  | 1tp9 (40%) | 61  | 2.5  | 0.25 | 2.75 | YES       | AhpD (Ahp1)                                                      |
| <b>41)</b> | >gi 6321388  | 2it2 (28%) | 53  | 1.75 | 1    | 2.75 | <b>NO</b> | uncharacterized protein (Tyw3)                                   |
| <b>42)</b> | >gi 93117370 | 1sfe (48%) | 168 | 0.75 | 2    | 2.75 | YES       | 6-O-methylguanine-DNA methylase (Mgt1)                           |
